1 **Estimates of abundance and change in abundance of the Indo-Pacific bottlenose dolphins**  
2 **(*Tursiops aduncus*) along the south coast of South Africa**

3

4 OA Vargas-Fonseca<sup>1,2\*</sup>, SP Kirkman<sup>3,2</sup>, WC Oosthuizen<sup>4</sup>, T Bouveroux<sup>1,#a</sup>, V Cockcroft<sup>1</sup>, D  
5 Conry<sup>1,2</sup>, PA Pistorius<sup>1,2</sup>.

6 <sup>1</sup> Department of Zoology, Nelson Mandela University, Port Elizabeth, South Africa

7 <sup>2</sup> Marine Apex Predator Research Unit (MAPRU), Institute for Coastal and Marine Research,  
8 Nelson Mandela University, Port Elizabeth, South Africa

9 <sup>3</sup> Branch: Oceans and Coasts, Department of Environment, Forestry and Fisheries (DEFF),  
10 Cape Town, South Africa

11 <sup>4</sup> Department of Zoology and Entomology, Mammal Research Institute, University of Pretoria,  
12 Hatfield, South Africa

13 <sup>#a</sup> Current address: Dauphin Island Sea Lab, University of South Alabama, Alabama, United  
14 States

15 \* Corresponding author

16 E-mail: [alejandra7979@hotmail.com](mailto:alejandra7979@hotmail.com) (OAVF)

## 17 **Abstract**

18 We investigated the abundance of Indo-Pacific bottlenose dolphins (*Tursiops aduncus*) along  
19 the south coast of South Africa, from the Goukamma Marine Protected Area (MPA) to the  
20 Tsitsikamma MPA, between 2014 and 2016. During this period, 662.3h of boat-based photo-  
21 identification survey effort was carried out, and the sighting histories of 817 identified  
22 individuals were used to estimate abundance using mark-recapture modelling. The selected  
23 open population model (POPAN) provided an estimate of 2,295 individuals (95% CI: 1,157-  
24 4,553) for the entire study area. A model estimate was produced for a subset of the study area,  
25 Plettenberg Bay, which could be compared with a past estimate for this location (2002-2003).  
26 The comparison suggested a 72.3% decrease in abundance, from 6,997 (95% CI: 5,230-9,492)  
27 in 2002-2003 to 1,940 (95% CI: 1,448-2,600) in 2014-2016. The decline in abundance was  
28 supported by a 72% reduction in mean group size for Plettenberg Bay between the periods. It  
29 is essential to be able to assess abundance changes at other locations to inform revision of *T.*  
30 *aduncus* conservation status in South Africa.

31

32 Keywords: population estimate, *Tursiops aduncus*, conservation management, mark-recapture,  
33 photo-ID.

## 34 **Introduction**

35 Information on the abundance and trends of wildlife populations is essential for species and  
36 ecosystem conservation management strategies [1,2]. Trends in abundance provide feedback  
37 on the success or failure of implemented conservation strategies and indicate natural or  
38 anthropogenic driven ecosystem changes [3]. In both terrestrial and marine ecosystems,  
39 predator population trends are thought to integrate the state of lower trophic levels and the  
40 physical environment that they inhabit [4,5]. For this reason predator population trends are  
41 often considered to be good indicators of ecosystem health.

42

43 The escalating human population, with disproportionately higher growth rates in coastal areas,  
44 is exerting increased pressure on coastal ecosystems and marine species. Coastally distributed  
45 dolphin species are highly susceptible to current and future human-related threats such as  
46 habitat degradation from pollution and coastal development (e.g., harbours and offshore wind  
47 farms), competition with fisheries, and bycatch in fishing gear or shark exclusion nets [6].  
48 Examples of inshore dolphin species that of current conservation concern and which face a  
49 multitude of threats include the vaquita (*Phocoena sinus*), humpback dolphins (*Sousa spp*) [7–  
50 9], Australian snubfin dolphins (*Orcaella heinsohni*) [10] and Hector's dolphins  
51 (*Cephalorhynchus hectori*) [11]. For such species, studies that document population size and  
52 trends are essential for conservation and management planning [12].

53

54 The Indo-Pacific bottlenose dolphin (*Tursiops aduncus*) has been listed as a Data Deficient  
55 species by the IUCN Red List of Threatened Species since 1996 [13]. Their distribution is  
56 apparently continuous along coastal areas (including mid-ocean island shores) in the Indian  
57 Ocean, from False Bay (South Africa) eastwards right through to the Solomon Islands and New

58 Caledonia in the western Pacific Ocean [14] including the east and west coasts of Australia and  
59 the south-east Asian waters [15]. The most recent South African Red List conservation  
60 assessment [16] recognized three sub-populations of *T. aduncus* in South African waters based  
61 on previous genetic studies [17] (Fig 1). A resident sub-population in northern KwaZulu-Natal  
62 (between Kosi Bay and Ifafa) was classified as Vulnerable; a migratory sub-population that is  
63 thought to move between Plettenberg Bay and Durban as Data Deficient; and a resident sub-  
64 population south of Ifafa with its western limit at False Bay as Near Threatened [16]. Research  
65 priorities identified by the conservation assessment [16] include (amongst others) conducting  
66 research into their population genetics to determine significant management units, assessing  
67 the effectiveness of Marine Protected Areas (MPA) in addressing conservation needs of sub-  
68 populations, and determining abundance estimates throughout their range as well as site  
69 specifically [16]. A subsequent genetic study [18,19] defined two conservation units (instead  
70 of three sub-populations) along the South African Coast: one along the Natal Bioregion and  
71 another in the Agulhas Bioregion (Fig 1). The results from genetic population structure analysis  
72 thus refutes the existence of a migratory sub-population [17] as described in the latest  
73 conservation assessment [16].

74

75 The abundance and changes in population numbers of *T. aduncus* along South Africa's coast  
76 is poorly understood; estimates of numbers are restricted to localised areas (summarized in 16)  
77 and data on changes in population numbers are non-existent. For the sub-population in the  
78 Agulhas Bioregion, only two mark-recapture abundance estimates are available: one in Algoa  
79 Bay (1991-1994) where 28,482 (95% CI: 16,220-40,744) individuals were estimated [20] and  
80 another for Plettenberg Bay (2002-2003) where 6,997 (95% CI: 5,230-9,492) individuals were  
81 estimated [21]. Results from these studies showed that numerous individuals were utilising

82 both areas, indicating a dynamic population on the south coast of South Africa with long-range  
83 movements [20].  
84 This study estimates *T. aduncus* population abundance and group sizes along 145 km of  
85 coastline in the Agulhas Bioregion off the south coast of South Africa. The data were obtained  
86 using boat-based surveys and mark-recapture methods. Furthermore, for a subset of the study  
87 area (Plettenberg Bay; 29 km of coastline), separate population abundance and group size  
88 estimates were determined so that it could directly be compared with a study conducted in this  
89 area more than ten years previously (2002-2003). Tourism is an important revenue along the  
90 Bitou municipality which includes Plettenberg Bay [22]. The latter is a growth centre for  
91 marine tourism activities including boat-based marine mammal viewing, fishing charters and  
92 adventure rides that can potentially disturb dolphins. This is the first attempt at assessing  
93 change abundance of a *T. aduncus* population over time at any location in South Africa. We  
94 hypothesized that dolphin numbers and group sizes would have decreased since the first  
95 assessment due to increasing human activities in the coastal zone.

## 96 **Methods**

### 97 **Study area, survey design and data collection**

98 Data were collected during standardized boat surveys along 145 km of coastline within the  
99 Agulhas Bioregion, between the western border of the Goukamma MPA and the eastern  
100 boundary of the Tsitsikamma MPA on the south coast of South Africa (Fig 1). Ninety-seven  
101 kilometres of the coastline of the study area is within MPAs, namely the Goukamma, Robberg  
102 and Tsitsikamma MPAs. There are two main dolphin hotspots in this area, namely the  
103 Goukamma MPA and the Plettenberg Bay area [23]; both areas are characterized by sandy  
104 shores and gentle slopes. The stretch between Goukamma to Robberg MPA and Tsitsikamma  
105 MPA is largely uninhabited (by humans) with exposed rocky coasts and steeper gradients.

106

#### 107 **Fig 1: Map of South Africa with relevant locations mentioned in the text**

108 (1) Kosi Bay; (2) Durban; (3) Ifafa; (4) Algoa Bay; (5) study area; (6) False Bay. The study  
109 area extended from the western boundary of Goukamma to the eastern boundary of the  
110 Tsitsikamma MPA. Boat surveys were conducted parallel to the coast (dashed black line).

111

112 The surveys were designed as a transect line running parallel to the coast. Bi-monthly boat  
113 surveys were conducted between March 2014 and February 2016. At least two experienced  
114 observers were present during surveys which were performed at a constant speed of  
115 approximately eight knots (see [23] for further information on study area, survey design and  
116 data collection procedures).

117

118 In this study, digital dorsal fin photo-ID images were taken using a Nikon SLR camera  
119 equipped with a Tamron 300 or 600 mm lens. The dorsal fins of as many dolphins as possible  
120 were photographed from both sides (if possible), without any preference towards individuals  
121 with obvious markings [1]. Group sizes were estimated independently as minimum, maximum  
122 and best estimates, with best estimates not necessarily being the mean of the upper and lower  
123 estimates [24]. A group was defined as two or more animals within a 100-m radius of each  
124 other, showing similar behaviour [25]. Survey effort was measured as the number of hours  
125 travelled in good sighting conditions (Beaufort scale  $\leq 3$ ). Survey effort was discontinued when  
126 conditions exceeded Beaufort scale 3.

127

## 128 **Data processing and analysis**

### 129 **Photo-identification catalogue and data selection**

130 Dorsal fin images were cropped and graded according to the photo quality (Q) and  
131 distinctiveness (D). Quality were scored from 1 to 3 (Q1 being excellent quality and Q3 poor  
132 quality). The Q grade was based upon photo clarity, contrast, angle, portion of frame filled by  
133 the fin, angle, exposure, water spray and the percentage of the fin image that is visible in the  
134 frame (adapted from [1,26,27]). Photographs graded Q1 were therefore well exposed, without  
135 water droplets, in sharp focus, with the dorsal fin orientated perpendicular to the photographer  
136 and occupying a large proportion of the frame (adapted from [1]). Using only photographs  
137 graded Q1-Q2, the fins were then graded according to the fin distinctiveness (D).  
138 Distinctiveness was graded from 1 to 3 (D1 very distinctive and D3 no distinctive  
139 characteristics). Photographs with distinctiveness grades D1-D2 were catalogued according to  
140 the location of the most prominent or distinguishing feature. The categories included: leading

141 edge, mutilated, peduncle and trailing edge; with the latter subdivided into entire, low, mid or  
142 upper third (adapted from [26]). As many features as possible were used to confirm matches  
143 and to reduce the possibility of false positives only long lasting markings were considered [1].  
144 Two different experienced researchers visually compared photographs from each category to  
145 avoid misidentification of individuals (first within the same category and subsequently between  
146 categories where required).

147

### 148 **New identifications and discovery curve**

149 To evaluate whether the population had been sampled comprehensively, the cumulative  
150 number of newly identified individuals was plotted over time in a discovery curve. If a  
151 discovery curve reaches an asymptote, this indicates that the whole population has been  
152 identified and that it is likely to be a closed population with no immigration or emigration (e.g.  
153 [1]). The discovery curve of an open population (births, deaths, immigration or emigration  
154 occurs) is not likely to reach an asymptote (e.g. [20]).

155

### 156 **Mark-recapture analysis**

157 Open and closed population models were fitted using the software MARK 8.2 [28] to estimate  
158 the population size of *T. aduncus* in the study area. Only high quality photographs ( $Q \leq 2$ ) were  
159 used to construct encounter histories for all the identified individuals ( $D \leq 2$ ) using calendar  
160 month as capture occasions.

161

162 Open population estimates were obtained using the POPAN parameterization [29], which  
163 calculates the super-population size ( $N$ ), apparent survival probability ( $\Phi$ ), capture probability  
164 ( $p$ ), and the probability of immigration or entry ( $b$ ) from the super-population to the local  
165 population present in the study area. Demographic parameters were designated as time



166 dependent (t), constant over time (.) or seasonal (s), whereas capture probability were  
167 additionally allowed to vary with survey effort. Seasons were defined as the austral winter  
168 (May-October) or summer (November-April) [30,31]. The most parsimonious model was  
169 selected using Akaike's Information Criterion for small sample sizes (AICc) [32]. Monthly  
170 survival probabilities estimated by the model were transformed to annual survival probability  
171 with associated variances re-scaled using the Delta method [33].

172  
173 Goodness-of-fit (GOF) of the fully time-dependent Cormack-Jolly-Seber (CJS) model was  
174 assessed in program RELEASE to verify whether the encounter history data met model  
175 assumptions [34], A variance inflation factor ( $\hat{c}$ ) was calculated based on the results of Test 2  
176 + Test 3 in order to determine if the data were over-dispersed ( $\hat{c} > 1$ ) or under-dispersed ( $\hat{c} <$   
177 1) and to evaluate the need for an adjusted model selection criterion (i.e. quasi-Akaike  
178 Information Criterion, QAICc). Test 2 determines capture homogeneity; Test 3 homogeneous  
179 survival probability; Test 3 SR presence of transience in the data; and Test 3Sm effect of  
180 capture on survival [34].

181  
182 We used closed population models to compare abundance estimates for data collected during  
183 2014 to 2016, to previous Plettenberg Bay abundance estimates [21]. This was because the past  
184 estimates were based only on closed models and the data were not available for re-analysis. In  
185 the earlier study closed models were fitted using the program CAPTURE in MARK [35]. The  
186 model selection was based upon model selection criteria values produced by the program  
187 CAPTURE [36]. The higher the selection criteria the better the model fits (larger value 1.0)  
188 and selection values lower than 0.75 should not be used to estimate abundance [35]. Presently,  
189 CAPTURE is considered to be an outdated programme for estimating abundance; for this  
190 reason the closed population models were also estimated in MARK. Huggins' model were set

191 as  $p=c$ , where the initial capture probability ( $p$ ) is equal to the recapture probability ( $c$ ). These  
192 settings were used because the animals were not physically captured and a behavioural  
193 response to capture was not expected.

194

## 195 **Estimating super-population size**

196 The mark-recapture abundance estimates refer to the number of marked individuals in the  
197 population. To estimate the super-population size of *T. aduncus*, the mark-recapture results  
198 were scaled up according to the proportion of marked individuals in good quality photos ( $\leq Q2$ )  
199 [1,26]. The proportion of marked individuals in the population was estimated from the ratio of  
200 distinctive individuals ( $D1 + D2$ ) to the total sample ( $D1 + D2 + D3$ ) [1,26,37]. The super-  
201 population size was estimated as:

$$202 \quad \hat{N}_{total} = \frac{\hat{N}}{\hat{\theta}}$$

203 where  $\hat{N}_{total}$  is the estimated abundance,  $\hat{N}$  is the mark-recapture estimate of the number of  
204 animals with long-lasting marks, and  $\hat{\theta}$  is the estimated proportion of animals with long lasting  
205 marks in the population [1]. The variance estimate was calculated using the delta method:

$$206 \quad var(\hat{N}_{total}) = \hat{N}_{total}^2 \left( \frac{var(\hat{N})}{\hat{N}^2} + \frac{1 + \hat{\theta}}{n\hat{\theta}} \right)$$

207 where  $n$  is the total number of animals from which  $\theta$  was estimated [1]. Confidence intervals  
208 for  $\hat{N}_{total}$  assumed that the error distribution was the same as that of the mark-recapture  
209 estimates of the marked population [1].

## 210 Results

211 In total, 662.3 h of survey effort were conducted over 189 surveys and 145 days from March  
 212 2014 to February 2016. *T. aduncus* were encountered throughout the year, Average group size  
 213 was estimated as  $47 \pm 55$  (mean  $\pm$  SD) individuals, with larger group sizes during winter ( $57 \pm$   
 214  $63$ ) compared to summer ( $35 \pm 42$ ; Table 1). For Plettenberg Bay only, the mean group size  
 215 was  $26 \pm 26$ , which is 78% lower than in 2002-2003 (Table 1).

216

217 **Table 1: *T. aduncus* group size statistics for the entire research area, and for Plettenberg**  
 218 **Bay only. Also included for comparison are past estimates for Plettenberg Bay (2002-**  
 219 **2003)**

|                                       | Summer                     | Winter                    | Overall                   |
|---------------------------------------|----------------------------|---------------------------|---------------------------|
| <b>Entire study area 2014-2016</b>    |                            |                           |                           |
| Mean $\pm$ SD                         | $35 \pm 42$                | $57 \pm 63$               | $47 \pm 55$               |
| Range                                 | 1-300                      | 1-350                     | 1-350                     |
| Median                                | 20                         | 40                        | 30                        |
| <b>Plettenberg Bay 2014-2016</b>      |                            |                           |                           |
| Mean $\pm$ SD                         | $26 \pm 28$                | $26 \pm 18$               | $26 \pm 26$               |
| Range                                 | 1-100                      | 3-65                      | 1-100                     |
| Median                                | 15                         | 23                        | 18                        |
| <b>Plettenberg Bay 2002-2003 [21]</b> |                            |                           |                           |
| Mean $\pm$ SD                         | $124 \pm 111$ <sup>1</sup> | $82 \pm 143$ <sup>1</sup> | $120 \pm NA$ <sup>3</sup> |
|                                       | $211 \pm 139$ <sup>2</sup> | $56 \pm 76$ <sup>2</sup>  |                           |
| Range                                 | NA                         | NA                        | 2-500 <sup>3</sup>        |
| Median                                | NA                         | NA                        | 80 <sup>3</sup>           |

220 'NA': not available; <sup>1</sup> in 2002; <sup>2</sup> in 2003; <sup>3</sup> in 2002-2003.

221

222 A total of 80.6 h was spent with *T. aduncus* groups during surveys and 10,431 dorsal fin  
223 photographs were taken and assessed for quality. Of 4,015 photographs found to be of  
224 acceptable quality ( $\leq Q2$ ), 2,274 photographs had individuals with sufficient distinctiveness ( $\leq$   
225 D2). The final catalogue consisted of 817 identified animals with a total of 1,558 photos (which  
226 includes multiple good photos per individual per sighting). The proportion of identifiable  
227 individuals (adults and juveniles) was 0.77. Of the identified animals, 72.7% were encountered  
228 only once, 16.8% were encountered twice, 6.2% were encountered three times and 4.3% were  
229 encountered between 4 and 7 times in the entire study area.

230 The discovery curve never reached an asymptote (Fig 2). New individuals were thus still being  
231 identified towards the end of the study period, suggesting either that the population is open or  
232 that not all individuals of a closed population had been identified.

233

234 **Fig 2: Number of *T. aduncus* identified from photographs, and the cumulative discovery**  
235 **curve for new individuals.**

236

## 237 **Abundance estimates**

### 238 **Open population model**

239 Goodness-of-fit results (Table in S1 Table) indicated that there was over-dispersion in the  
240 encounter history data summarising the observations made in the entire research area, with a  
241 variance inflation factor of  $\hat{c} = 1.71$ . Goodness of fit tests suggested there was heterogeneity in  
242 capture probabilities between individuals, and that transient animals (permanent emigration  
243 after a single encounter) were present. The most parsimonious POPAN model for the entire  
244 area assumed constant survival, time dependent capture probability, a seasonal (summer and  
245 winter) probability to enter the local population from the super-population, and a constant  
246 super-population size (Table in S2 Table). The model produced a super-population size of  
247 2,295 (SE: 827; 95% CI: 1,157-4,553). The annual survival was estimated to be 0.87 ( $\pm 0.12$ ).

### 248 **Closed population model**

249 The most appropriate model for Plettenberg Bay (2014- 2016) had capture probability as time-  
250 dependent. The model  $M_t$  produced an abundance estimate of 1,063 (SE: 125, 95% CI: 858-  
251 1,360) marked individuals which translates to a super-population size of 1,381 (SE: 163, 95%  
252 CI: 1,097-1,738) individuals (Table 2). The model  $M_{th}$ , which assumed heterogeneous  
253 capture probabilities that varied with time, was the next most parsimonious model to explain  
254 the variation in the data according to the selection criteria value (0.76; Table in S3 Table). This  
255 model structure was also used by [21] to model abundance in Plettenberg Bay in 2002-2003.

256 Because it is recommended that selection values lower than 0.75 should not be used to estimate  
257 abundance [35], comparison using this model was justified. The abundance estimate for this  
258 model M(th) was 1,494 (SE: 224, 95% CI: 1,131-2,024) marked individuals, giving a super-  
259 population estimate of 1,940 (SE: 291, 95% CI: 1,448-2,600) for the bay (Table 2). This is  
260 72.3% lower than the estimate of 6,997 for Plettenberg Bay in 2002-2003 [21]. The closed  
261 population analyses for the 2014-2016 period were repeated using MARK (Table in S4 Table).  
262 The best model (based on  $\Delta AIC$ ) for Plettenberg Bay was  $p=c(t)$ , denoting that the capture and  
263 recapture probabilities are equivalent and time dependent. This model predicted a super-  
264 population size for Plettenberg Bay of 1,386 (SE: 62; 95% CI: 922-2,083) individuals.  
265  
266

267 **Table 2: Estimates of *T. aduncus* abundance based on closed population models**  
 268 **conducted using CAPTURE in the entire study area, and for the Plettenberg Bay area in**  
 269 **isolation for the periods 2002-2003 and 2014-2016.** Estimate of marked population (N) and  
 270 super-population size (NT); standard error (SE); lower and upper limits of the 95% confidence  
 271 interval (LCL and UCL).

| Model <sup>1</sup>                              | Marked population |     |      |      | Super-population |     |      |      |
|-------------------------------------------------|-------------------|-----|------|------|------------------|-----|------|------|
|                                                 | N                 | SE  | LCL  | UCL  | NT               | SE  | LCL  | UCL  |
| <b>Entire study area (2014-2016)</b>            |                   |     |      |      |                  |     |      |      |
| M(th)                                           | 2103              | 144 | 1850 | 2417 | 2731             | 188 | 2387 | 3126 |
| <b>Plettenberg Bay (2014-2016)</b>              |                   |     |      |      |                  |     |      |      |
| M(t)                                            | 1063              | 125 | 858  | 1360 | 1381             | 163 | 1097 | 1738 |
| M(th)                                           | 1494              | 224 | 1131 | 2024 | 1940             | 291 | 1448 | 2600 |
| <b>Plettenberg Bay (2002-2003) <sup>2</sup></b> |                   |     |      |      |                  |     |      |      |
| M(th)                                           | 4833              | 742 | 3612 | 6556 | 6997             | 742 | 5230 | 9492 |

272 <sup>1</sup> Model description: M(t) - time varying capture probability (p); M(h) - heterogeneous p; M(th)  
 273 a combination of the above [35].

274 <sup>2</sup> Results extracted from [21].

275

## 276 **Discussion**

277 The current lack of knowledge of *T. aduncus* abundance and trends in South Africa hampers  
278 conservation assessments [16]. This study contributes novel information to assist conservation  
279 management by reporting *T. aduncus* abundance estimates in the Agulhas Bioregion of the  
280 southern Cape, and apparent change in abundance for the Plettenberg Bay sub-region. The  
281 large number of identified individuals in this study (817) and the low re-encounter rates (27%)  
282 supports the notion that individuals observed within the study area are part of a much larger  
283 open population that ranges as far as Algoa Bay [20].

284  
285 The best open population estimate for the entire study area gave super-population size estimate  
286 of 2,295 individuals. This estimate needs to be interpreted with some caution, because  
287 goodness-of-fit results suggested over-dispersion in the mark-recapture data, with strong  
288 transience and heterogeneity in capture probabilities between individuals. The most  
289 parsimonious closed population model  $\{p=c(t)\}$ , whereby the capture and recapture probability  
290 are equivalent and time dependent gave a similar estimate to that of the open model, namely  
291 1,940 individuals (Table in S4 Table).

292  
293 A closed population model was required to compare abundance estimates from the present  
294 study with estimates derived from data collected between 2002 and 2003 [21]. The comparison  
295 between the two study periods (more than 10 years apart) is important because there is no other  
296 information on changes in population abundance for this species in South African waters,  
297 leading to considerable uncertainty regarding the species' conservation status [16]. The best  
298 estimate for Plettenberg Bay in 2002-2003, was 6,997 dolphins. In comparison, the two most  
299 reliable estimates for this study were 1,381 and 1,940 individuals. The latter estimate is 72.3%  
300 lower than the 2002-2003 estimate.



301 The low re-encounter rate of known individuals in the area may have been influenced by there  
302 being a sizable proportion of transient animals in the population. For future studies, this could  
303 potentially be remedied through greater search effort in the area. However this is often not  
304 realistic due to weather constrains and moreover it would imply exorbitant costs for the running  
305 of dedicated research vessels. Using the tourist vessels as platforms of opportunity is a possible  
306 alternative but there would have to be consistency in the methods used during searching and  
307 encounters. Another alternative for estimating abundance and monitoring change in the area is  
308 through aerial surveys using a distance sampling approach. Aerial surveys can cover much  
309 more ground in a day, but have disadvantages such as the need for almost perfect weather  
310 conditions and very good water clarity in order to have a good detection rate (e.g. when animals  
311 are underwater). Furthermore abundance estimates from aerial survey are likely to be  
312 negatively biased by only taking into account individuals that are in the study area at the time  
313 of the survey, whereas the mark-recapture open models allow for individuals to enter and leave  
314 the study area. Another important limitation of aerial surveys is undercounting bias whereby  
315 as much as two thirds of animals may not be detected during the surveys, as shown in previous  
316 aerial survey studies (e.g. [38]). For this reason it is recommended that if aerial surveys are  
317 used, twin platform surveys should be conducted (e.g. [39]) whereby two aircraft survey the  
318 same transect independently but minutes apart in order to estimate the number of missed  
319 sightings.

320

321 A pilot study consisting of nine aerial surveys was conducted during the study period, to test  
322 the practicality of surveying *T. aduncus* using this method [18]. Abundance estimates were not  
323 derived from aerial surveys because there were too few surveys ( $n=9$ ) for a robust population  
324 estimate. The group size estimates from boat surveys are, however, corroborated by the aerial  
325 survey estimates, with both survey methods detecting larger group sizes during winter [18].

326 The overall mean group size during aerial surveys along the entire study area was  $43 \pm 37$   
327 (range: 1-150; median: 33; n= 42), compared with  $47 \pm 55$  individuals from boat-based surveys  
328 (Table 1). In winter, the estimate from aerial surveys was  $46 \pm 34$  (range: 6-100; median: 39;  
329 n= 12) compared with  $57 \pm 63$ ; and in summer,  $41 \pm 38$  (range: 1-150; median: 30; n= 30)  
330 compared with  $35 \pm 42$ , respectively.

331  
332 Smaller average group size were recorded in Plettenberg Bay (26 individuals) compared with  
333 the whole study area (47 individuals). Both these estimates are considerably lower than the  
334 mean group size of 120 that was estimated for 2002-2003 in Plettenberg Bay [21]; the decline  
335 in group size for Plettenberg Bay between the two periods was 78.3%. A decline in average  
336 group size is also corroborated by a shore-based estimate of mean group size from the early  
337 1970s, of 140.3 [40]. The decline in group size may be an indication of a decline in numbers  
338 and appears to support the decline shown by the modelled abundance estimates.

339  
340 Another factor that could have influenced the decline of group size and abundance is a  
341 reduction in the numbers of transient groups using the area. In several recent years South  
342 Africa's annual sardine run which is characterized by large schools of sardine (*Sardinops*  
343 *sagax*) moving northwards along the east coast during winter months, followed by vast  
344 numbers of predators including *T. aduncus* [41], has been less pronounced than in the past [42].  
345 The dwindling size of the sardine run could have the effect that less transient groups of *T.*  
346 *aduncus* navigate through the study area. Declines in the availability of other important prey  
347 resources for *T. aduncus* such as squid [43,44], which spawn in a distinct area around  
348 Plettenberg Bay [45] but which have been less productive in recent years[46] could also have  
349 affected *T. aduncus* numbers in the area.

350

351 An important change in Plettenberg Bay since the 2002-2003 study of *T. aduncus* is the  
352 growing resident Cape fur seal colony (*Arctocephalus pusillus pusillus*) on the Robberg  
353 Peninsula [47]. This could cause direct competition for prey resources with *T. aduncus*  
354 including for species such as: piggy (*Pomadasyris olivaceum*), squid (*Loligo vulgaris reynaudii*),  
355 cuttlefish (*Sepia spp.*), red tjob-tjob (*Pagellus bellottii*), sardine (*Sardinops sagax*) and octopus  
356 (*Octopus spp.*) [43,48]. Furthermore, there is likely to have been an increase in the abundance  
357 of great white sharks (*Carcharodon carcharias*), that are attracted to seal colonies, in the area.  
358 This impact of the sharks on the *T. aduncus* population may be direct (i.e. predation in itself)  
359 [49]; or indirect, whereby the predation risk brings about increased stress levels in the prey  
360 population that can reduce their performance and productivity, or changes in residency patterns  
361 reducing time spent in the area [50].

362  
363 Due to their coastal distribution, *T. aduncus* are also vulnerable to multifarious anthropogenic  
364 pressures associated with coastal and inshore areas that could bring about shifts in residency  
365 patterns or a population decline. In our study area such pressures include coastal development,  
366 vessel traffic and associated disturbance, especially those related with boat-based cetacean  
367 viewing ventures [6,51,52]. The longevity and relatively low reproductive rate of this species  
368 aggravates the effects of habitat degradation and other threats. The Bitou municipality (which  
369 includes Plettenberg Bay) is the fastest growing municipality in the Western Cape Province,  
370 with an average annual population growth of 4.8% from 2001 to 2013 and tourism brings in  
371 much revenue to the area [22]. However, while it may be tempting to link the decline in *T.*  
372 *aduncus* numbers and group sizes with the increasing population and associated pressures in  
373 the area, a considerable increase in the mean group size of the same species in the more  
374 developed Algoa Bay to the east has been shown, from 18 to 76 individuals between 2008 and

375 2016 [53], which can be a consequence of a shift of the population's preferred habitat in recent  
376 years.

377

378 While the causes of the changes in Plettenberg Bay are not yet well understood, a precautionary  
379 approach especially with regard to impacts of the burgeoning tourism industry is advised, and  
380 this is naturally also in the interests of the industry's sustainability. The impacts of tourism on  
381 animal populations is generally measured by short-term behavioural responses (e.g. [52]), yet  
382 evidence is mounting that disturbance caused by these activities have long-term demographic  
383 implications. In Plettenberg Bay, boat-based ecotourism may have impacted on the sympatric  
384 Indian Ocean humpback dolphins (*Sousa plumbea*), which is known to be sensitive to human  
385 presence. Preliminary results have shown a decline in abundance of this population by  
386 approximately 46% between 2002-2003 [54] and 2012-2013 [55]. Simultaneously, a 35%  
387 reduction in the mean group size of this species between the two periods was documented [55].

388

389 In other parts of the world, *Tursiops spp.* have also been declining. For example, in Australia  
390 [56] and the Bahamas [57], declines of 15% and 49% were attributed to effects of tour operator  
391 vessels and a combination of natural and anthropogenic factors. Some of the measures that  
392 were taken in other parts of the world to mitigate impacts and protect *Tursiops spp.* includes  
393 the creation of protected areas (e.g. [58]).

394

395 While *T. aduncus* was recently assessed to be Near Threatened in South Africa [16], the *S.*  
396 *plumbea* is currently Endangered at the national level on account of the small size of the  
397 population and apparent decline, exacerbated by its fragmented distribution with considerable  
398 movement within the bioregions [59,60]. Expanding the current MPAs or identifying new  
399 conservation areas has been recommended for *S. plumbea* in South Africa [60]. Given the

400 sympatry of the two species, such measures could also address certain conservation needs for  
401 *T. aduncus*; e.g. if vessel traffic is strictly controlled in such areas, if critical habitat types are  
402 protected and if human pressures on prey resources in such areas are reduced such that  
403 productivity and overspill of certain prey into adjoining areas may occur (e.g. [61,62]).

## 404 **Conclusions**

405 This is the first study to show a change over time in abundance for the *T. aduncus* anywhere in  
406 South Africa. While a comparison based on closed population models between two periods for  
407 a population that is likely to be open in nature may not be ideal and intuitively should be  
408 accepted with caution, such a comparison was called for given the lack of such information on  
409 the species and resulting uncertainty regarding its conservation status in the country. Moreover,  
410 comparison of mean group sizes between the two periods 2002-2003 and 2014-2016 also  
411 showed a substantial decrease that corroborated the model-estimated decline in abundance  
412 during the same period. While the causes of the apparent changes are not yet well known,  
413 precautionary measures or controls to prevent and mitigate disturbance to the population and  
414 also that of the sympatric, Endangered *S. plumbea* are advised, especially with regard to  
415 potential disturbance associated with marine tourism activities. The results of this study  
416 highlight the need for further research and monitoring in the area as well as the importance of  
417 assessing abundance changes at other sites to inform revision of *T. aduncus* conservation status  
418 in South Africa.

## 419 **Acknowledgements**

420 Special thanks to numerous individuals from Ocean Odyssey, Enrico's Fishing Charters, Orca  
421 Foundation, Ocean Blue Adventures and South African National Parks (Tsitsikamma) for  
422 providing research vessels and skippers. Special thanks to students and volunteers who assisted  
423 with data collection. This research was conducted under a Memorandum of Understanding for  
424 research between Nelson Mandela University and the Department of Environmental Affairs  
425 (DEA), and would not have been possible without DEA support.  
426

## 427 **References**

428

- 429 1. Wilson B, Hammond PS, Thompson PM. Estimating size and assessing trends in a  
430 coastal bottlenose dolphin population. *Ecol Appl.* 1999;9: 288–300. doi:10.1890/1051-  
431 0761(1999)009[0288:ESAATI]2.0.CO;2
- 432 2. Brown AM, Bejder L, Pollock KH, Allen SJ. Site-Specific Assessments of the  
433 Abundance of Three Inshore Dolphin Species to Inform Conservation and Management.  
434 *Front Mar Sci.* 2016;3: 1–18. doi:10.3389/fmars.2016.00004
- 435 3. Ansmann IC, Parra GJ, Chilvers BL, Lanyon JM. Dolphins restructure social system  
436 after reduction of commercial fisheries. *Anim Behav.* 2012;84: 575–581.  
437 doi:10.1016/j.anbehav.2012.06.009
- 438 4. Frederiksen, M. Mavor, R.A. Wanless S. Seabirds as environmental indicators: the  
439 advantages of combining data sets. *Mar Ecol Prog Ser.* 2007; 205–212.
- 440 5. Moore S. Marine mammals as ecosystem sentinels. *J Mammal.* 2008; 534–540.
- 441 6. Elwen S, Findlay K, Kiszka J, Weir C. Cetacean research in the southern African  
442 subregion: a review of previous studies and current knowledge. *African J Mar Sci.*  
443 2011;33: 469–493. doi:10.2989/1814232X.2011.637614
- 444 7. Collins T, Braulik GT, Perrin W. *Sousa teuszii* (errata version published in 2018). In:  
445 *The IUCN Red List of Threatened Species 2017: e.T20425A123792572.* 2017.
- 446 8. Jefferson TA, Smith BD, Braulik GT, Perrin W. *Sousa chinensis* (errata version  
447 published in 2018). In: *The IUCN Red List of Threatened Species 2017:*  
448 *e.T82031425A123794774.* 2017.
- 449 9. Parra G, Cagnazzi D, Perrin W, Braulik G. *Sousa sahalensis*. In: *The IUCN Red List of*  
450 *Threatened Species 2017: e.T82031667A82031671.*
- 451 10. Parra G, Cagnazzi D, Beasley I. *Orcaella heinsohni* (errata version published in 2018).



- 452 In: The IUCN Red List of Threatened Species 2017: e.T136315A123793740.
- 453 11. Reeves RR, Dawson SM, Jefferson TA, Karczmarski L, Laidre K, O’Corry-Crowe G,  
454 et al. *Cephalorhynchus hectori*. In: The IUCN Red List of Threatened Species 2013:  
455 e.T4162A44199757. 2013.
- 456 12. Huang S-L, Karczmarski L, Chen J, Zhou R, Lin W, Zhang H, et al. Demography and  
457 population trends of the largest population of Indo-Pacific humpback dolphins. *Biol*  
458 *Conserv.* 2012;147: 234–242. doi:10.1016/j.biocon.2012.01.004
- 459 13. Hammond PS, Bearzi G, Bjørge A, Forney KA, Karczmarski L, Kasuya T, et al.  
460 *Tursiops aduncus*. In: The IUCN Red List of Threatened Species 2012:  
461 e.T41714A17600466.
- 462 14. Wang, J. Y. and Yang SSC. Indo-Pacific Bottlenose Dolphin *Tursiops aduncus*. 2nd ed.  
463 In: Perrin W, Würsig B, Thewissen JGM, editors. *Encyclopedia of Marine Mammals*.  
464 2nd ed. San Diego, California: Elsevier,; 2009. pp. 602–608.
- 465 15. Hale P, Barreto A, Ross G. Comparative morphology and distribution of the *aduncus*  
466 and *truncatus* forms of bottlenose dolphin *Tursiops* in the Indian and Western Pacific  
467 Oceans. *Aquat Mamm.* 2000;26: 101–110.
- 468 16. Cockcroft V, Natoli A, Reisinger R, Elwen SH, Hoelzel AR, Atkinson S, et al. A  
469 Conservation Assessment of *Tursiops aduncus*. Child MF, Roxburgh L, Do Linh San E,  
470 Raimondo D, Davies-Mostert H., editors. *Red List Mamm South Africa, Swazil*  
471 *Lesotho*. South African National Biodiversity Institute and Endangered Wildlife Trust,  
472 South Africa,; 2016. Available: <https://www.ewt.org.za/Reddata/pdf/Cetacea/2016>  
473 *Mammal Red List\_Tursiops aduncus\_VU.pdf*
- 474 17. Natoli A, Peddemors VM, Hoelzel AR. Population structure of bottlenose dolphins  
475 (*Tursiops aduncus*) impacted by bycatch along the east coast of South Africa. *Conserv*  
476 *Genet.* 2007;9: 627–636. doi:10.1007/s10592-007-9379-y

- 477 18. Vargas-Fonseca OA. Population ecology of Indo-Pacific bottlenose dolphins along the  
478 south-east coast of South Africa. Nelson Mandela University. 2018.
- 479 19. Yates P. Population Genetics of Indo-Pacific Bottlenose Dolphins and Influence of the  
480 Sardine Run Off the South-East Coast of South Africa. Trevelyan College. 2018.
- 481 20. Reisinger RR, Karczmarski L. Population size estimate of Indo-Pacific bottlenose  
482 dolphins in the Algoa Bay region, South Africa. *Mar Mammal Sci.* 2010;26: 86–97.  
483 doi:10.1111/j.1748-7692.2009.00324.x
- 484 21. Phillips G. Bottlenose dolphins (*Tursiops aduncus*) in Plettenerbg Bay, South Africa:  
485 Population estimates and temporal dynamics of groups. Nelson Mandela Metropolitan  
486 University. 2006.
- 487 22. Socio-economic Profile Bitou Municipality. Western Cape Government Provincial  
488 Treasury; 2014.
- 489 23. Vargas-Fonseca OA, Kirkman SP, Conry D, Rishworth GM, Cockcroft V. Distribution  
490 and habitat use of Indo-Pacific bottlenose dolphins *Tursiops aduncus* along the south  
491 coast of South Africa. *African J Mar Sci.* 2018;40: 439–450.  
492 doi:10.2989/1814232X.2018.1547221
- 493 24. Findlay KP, Seakamela SM, Meyer MA, Kirkman SP, Barendse J, Cade DE, et al.  
494 Humpback whale “super-groups” - A novel low-latitude feeding behaviour of Southern  
495 Hemisphere humpback whales (*Megaptera novaeangliae*) in the Benguela Upwelling  
496 System. *PLoS One.* 2017;12: 1–18. doi:10.1371/journal.pone.0172002
- 497 25. Irvine AB, Scott MD, Wells RS, Kaufmann JH. Movements and activities of the Atlantic  
498 bottlenose dolphin, *Tursiops truncatus*, near Sarasota, Florida. *Fish Bull US.* 1981;79:  
499 671–688.
- 500 26. Urian KW, Hohn AA, Hansen LJ. Status of the Photo-identification Catalog of Coastal  
501 Bottlenose Dolphins of the Western North Atlantic: Report of a Workshop of Catalogue

- 502 Contributors. NOAA Administrative Report NMFS-SEFSC-425; 1999.
- 503 27. Urian K, Gorgone A, Read A, Balmer B, Wells RS, Berggren P, et al. Recommendations  
504 for photo-identification methods used in capture-recapture models with cetaceans. *Mar*  
505 *Mammal Sci.* 2015;31: 298–321.
- 506 28. White GC, Burnham KP. Program MARK: Survival estimation from populations of  
507 marked animals. *Bird Study.* 1999;46: 120–139.
- 508 29. Schwarz CJ, Arnason AN. A general methodology for the analysis of capture-recapture  
509 experiments in open populations. *Biometrics.* 1996;52: 860–873.
- 510 30. Karczmarski L, Cockcroft VG, McLachlan A. Group size and seasonal pattern of  
511 occurrence of humpback dolphins *Sousa chinensis* in Algoa Bay, South Africa. *South*  
512 *African J Mar Sci.* 1999;21: 89–97. doi:10.2989/025776199784126024
- 513 31. James B, Bester M, Penry G, Gennari E, Elwen S. Abundance and degree of residency  
514 of humpback dolphins *Sousa plumbea* in Mossel Bay, South Africa. *African J Mar Sci.*  
515 2015;37: 383–394. doi:10.2989/1814232X.2015.1083477
- 516 32. Burnham KP, Anderson DR. Model selection and multimodel inference: a practical  
517 information-theoretic approach. 2nd ed. New York: Springer-Verlag; 2002.
- 518 33. Powell L. Approximating variance of demographic parameters using the delta method:  
519 a reference for avian biologists. *Condor.* 2007;109: 949–954.
- 520 34. Cooch E, White G. Program Mark-a gentle introduction. 11th ed. Available from  
521 [http://www.phidot.org](http://www.phidot.org;); 2012.
- 522 35. Otis DL, Burnham KP, White GC, Anderson DR. Statistical inference from capture data  
523 on closed animal populations. *Wildl Monogr.* 1978;62: 1–135.
- 524 36. Rexstad E, Burnham K. User's Guide for Interactive Program CAPTURE. Abundance  
525 Estimation of Closed Animal Population. Colorado State University, Fort Collins; 1991.
- 526 37. Read AJ, Urian KW, Wilson B, Waples DM. Abundance of bottlenose dolphins in the

- 527 bays, sounds, and estuaries of North Carolina. *Mar Mammal Sci.* 2003;19: 59–73.
- 528 38. Cockcroft V., Ross. G.J.B, Peddemors VM, Borchers DL. Estimate of abundance and  
529 undercounting of bottlenose dolphins of northern Natal, South Africa. *South African J*  
530 *Wildl Res.* 1992;22: 102–109.
- 531 39. Findlay KP, Cockcroft VG, Guissamulo AT. Dugong abundance and distribution in the  
532 Bazaruto Archipelago, Mozambique. *African J Mar Sci.* 2011;33: 441–452.  
533 doi:10.2989/1814232X.2011.637347
- 534 40. Saayman GS, Tayler CK, Mammalogy J, Nov N. Social Organisation of Inshore  
535 Dolphins ( *Tursiops aduncus* and *sousa* ) in the Indian Ocean. *J Mammal.* 1973;54: 993–  
536 996.
- 537 41. O’Donoghue SH, Whittington PA, Dyer BM, Peddemors VM. Abundance and  
538 distribution of avian and marine mammal predators of sardine observed during the 2005  
539 KwaZulu-Natal sardine run survey. *African J Mar Sci.* 2010;32: 361–374.  
540 doi:10.2989/1814232X.2010.502640
- 541 42. van der Lingen C. Are catches of sardine off the south coast having a negative impact  
542 on the KZN sardine run? *Fisheries.* 2015;2005: 1–7.
- 543 43. Cockcroft VG, Ross. G.J.B. Food and feeding of the Indian Ocean bottlenose dolphin  
544 off southern Natal, South Africa. In: Leatherwood S RR, editor. *The bottlenose dolphin.*  
545 *San Diego: Academic Press; 1990. pp. 295–308. doi:10.1016/B978-0-12-440280-*  
546 *5.50019-6*
- 547 44. Amir OA, Berggren P, Ndaro SGM, Jiddawi NS. Feeding ecology of the Indo-Pacific  
548 bottlenose dolphin (*Tursiops aduncus*) incidentally caught in the gillnet fisheries off  
549 Zanzibar, Tanzania. *Estuar Coast Shelf Sci.* 2005;63: 429–437.  
550 doi:10.1016/j.ecss.2004.12.006
- 551 45. Roberts. Chokka squid (*Loligo vulgaris reynaudii*) abundance linked to changes in South

- 552 Africa's Agulhas Bank ecosystem during spawning and the early life cycle. *ICES J Mar*  
553 *Sci.* 2005;62: 33–55. doi:10.1016/j.icesjms.2004.10.002
- 554 46. DAFF. Status of the South African marine fishery resources 2014. Daff. Department of  
555 Agriculture, Forestry and Fisheries (Cape Town, South Africa); 2014. Available:  
556 [http://www.nda.agric.za/doadev/sidemenu/fisheries/indexpage\\_DOCS/STATUS](http://www.nda.agric.za/doadev/sidemenu/fisheries/indexpage_DOCS/STATUS)  
557 [REPORT 2012FINAL DRAFT.pdf](#)
- 558 47. Huisamen J, Kirkman S, Watson L, Cockcroft V, Pistorius P. Recolonisation of the  
559 Robberg Peninsula (Plettenberg Bay, South Africa) by Cape fur seals. *African J Mar*  
560 *Sci.* 2011;33: 453–461. doi:10.2989/1814232X.2011.637349
- 561 48. Huisamen J, Kirkman S, van der Lingen C, Watson L, Cockcroft V, Jewell R, et al. Diet  
562 of the Cape fur seal *Arctocephalus pusillus pusillus* at the Robberg Peninsula,  
563 Plettenberg Bay, and implications for local fisheries. *African J Mar Sci.* 2012;34: 37–  
564 41. doi:10.2989/1814232X.2012.725524
- 565 49. Hussey N, McCann H, Cliff G, Dudley S, Wintner S, Fisk A. Size-Based Analysis of  
566 Diet and Trophic Position of the White Shark, *Carcharodon carcharias*, in South African  
567 Waters. In: Domeier M, editor. *Global Perspectives on the Biology and Life History of*  
568 *the White Shark.* 2012. pp. 27–50. doi:10.1201/b11532-5
- 569 50. Hammerschlag N, Meyer M, Seakamela SM, Kirkman S, Fallows C, Creel S.  
570 Physiological stress responses to natural variation in predation risk: evidence from  
571 white sharks and seals. *Ecology.* 2017;98: 3199–3210.
- 572 51. Cockcroft V, Ross GJB, Peddemors V. Bottlenose dolphins *Tursiops truncatus*  
573 distribution in Natal coastal waters. *South African J Mar Sci.* 1990;9: 1–10.
- 574 52. Constantine R, Brunton DH, Dennis T. Dolphin-watching tour boats change bottlenose  
575 dolphin (*Tursiops truncatus*) behaviour. *Biol Conserv.* 2004;117: 299–307.  
576 doi:10.1016/j.biocon.2003.12.009

- 577 53. Bouveroux T, Caputo M, Froneman P, Plon S. Largest reported groups for the Indo-  
578 Pacific bottlenose dolphin (*Tursiops aduncus*) found in Algoa Bay, South Africa: Trends  
579 and potential drivers. *Mar Mammal Sci.* 2018; 1–21. doi:10.1111/mms.12471
- 580 54. Jobson AJ. Insights into population size, group dynamics and site fidelity of Humpback  
581 dolphins (*Sousa chinensis*) in Plettenberg Bay, South Africa. Nelson Mandela  
582 Metropolitan University, Port Elizabeth, South Africa. 2006.
- 583 55. Greenwood G. Population changes and spatial distribution of Indo-Pacific humpback  
584 dolphins (*Sousa chinensis*) within the Plettenberg Bay area. Nelson Mandela  
585 Metropolitan University, Port Elizabeth, South Africa. 2013.
- 586 56. Bejder L, Samuels A, Whitehead H, Gales N, Mann J, Connor R, et al. Decline in relative  
587 abundance of bottlenose dolphins exposed to long-term disturbance. *Conserv Biol.*  
588 2006;20: 1791–8. doi:10.1111/j.1523-1739.2006.00540.x
- 589 57. Fearnbach H, Durban J, Parsons K, Claridge D. Photographic mark-recapture analysis  
590 of local dynamics within an open population of dolphins. *Ecol Appl.* 2012;22: 1689–  
591 700.
- 592 58. Hooker SK, Gerber LR. Marine Reserves as a Tool for Ecosystem-Based Management :  
593 The Potential Importance of Megafauna. *Bioscience.* 2004;54: 27–39.
- 594 59. Plön S, Atkins S, Conry D, Pistorius P, Cockcroft V, Child M. A conservation  
595 assessment of *Sousa plumbea* – Indian Ocean Humpback Dolphin. *The Red List of*  
596 *Mammals of South Africa, Swaziland and Lesotho.* 2016. pp. 1–11.
- 597 60. Vermeulen E, Bouveroux T, Plön S, Atkins S, Chivell W, Cockcroft V, et al. Indian  
598 Ocean humpback dolphin (*Sousa plumbea*) movement patterns along the South African  
599 coast. *Aquat Conserv Mar Freshw Ecosyst.* 2017;28: 231–240. doi:10.1002/aqc.2836
- 600 61. Attwood CG, Mann BQ, Beaumont J, Harris JM. Review of the state of marine protected  
601 areas in South Africa. *South African J Mar Sci.* 1997;18: 341–367.

602 doi:10.2989/025776197784160910

603 62. Kerwath SE, Winker H, Götz A, Attwood CG. Marine protected area improves yield

604 without disadvantaging fishers. *Nat Commun.* 2013;4: 1–6. doi:10.1038/ncomms3347

605

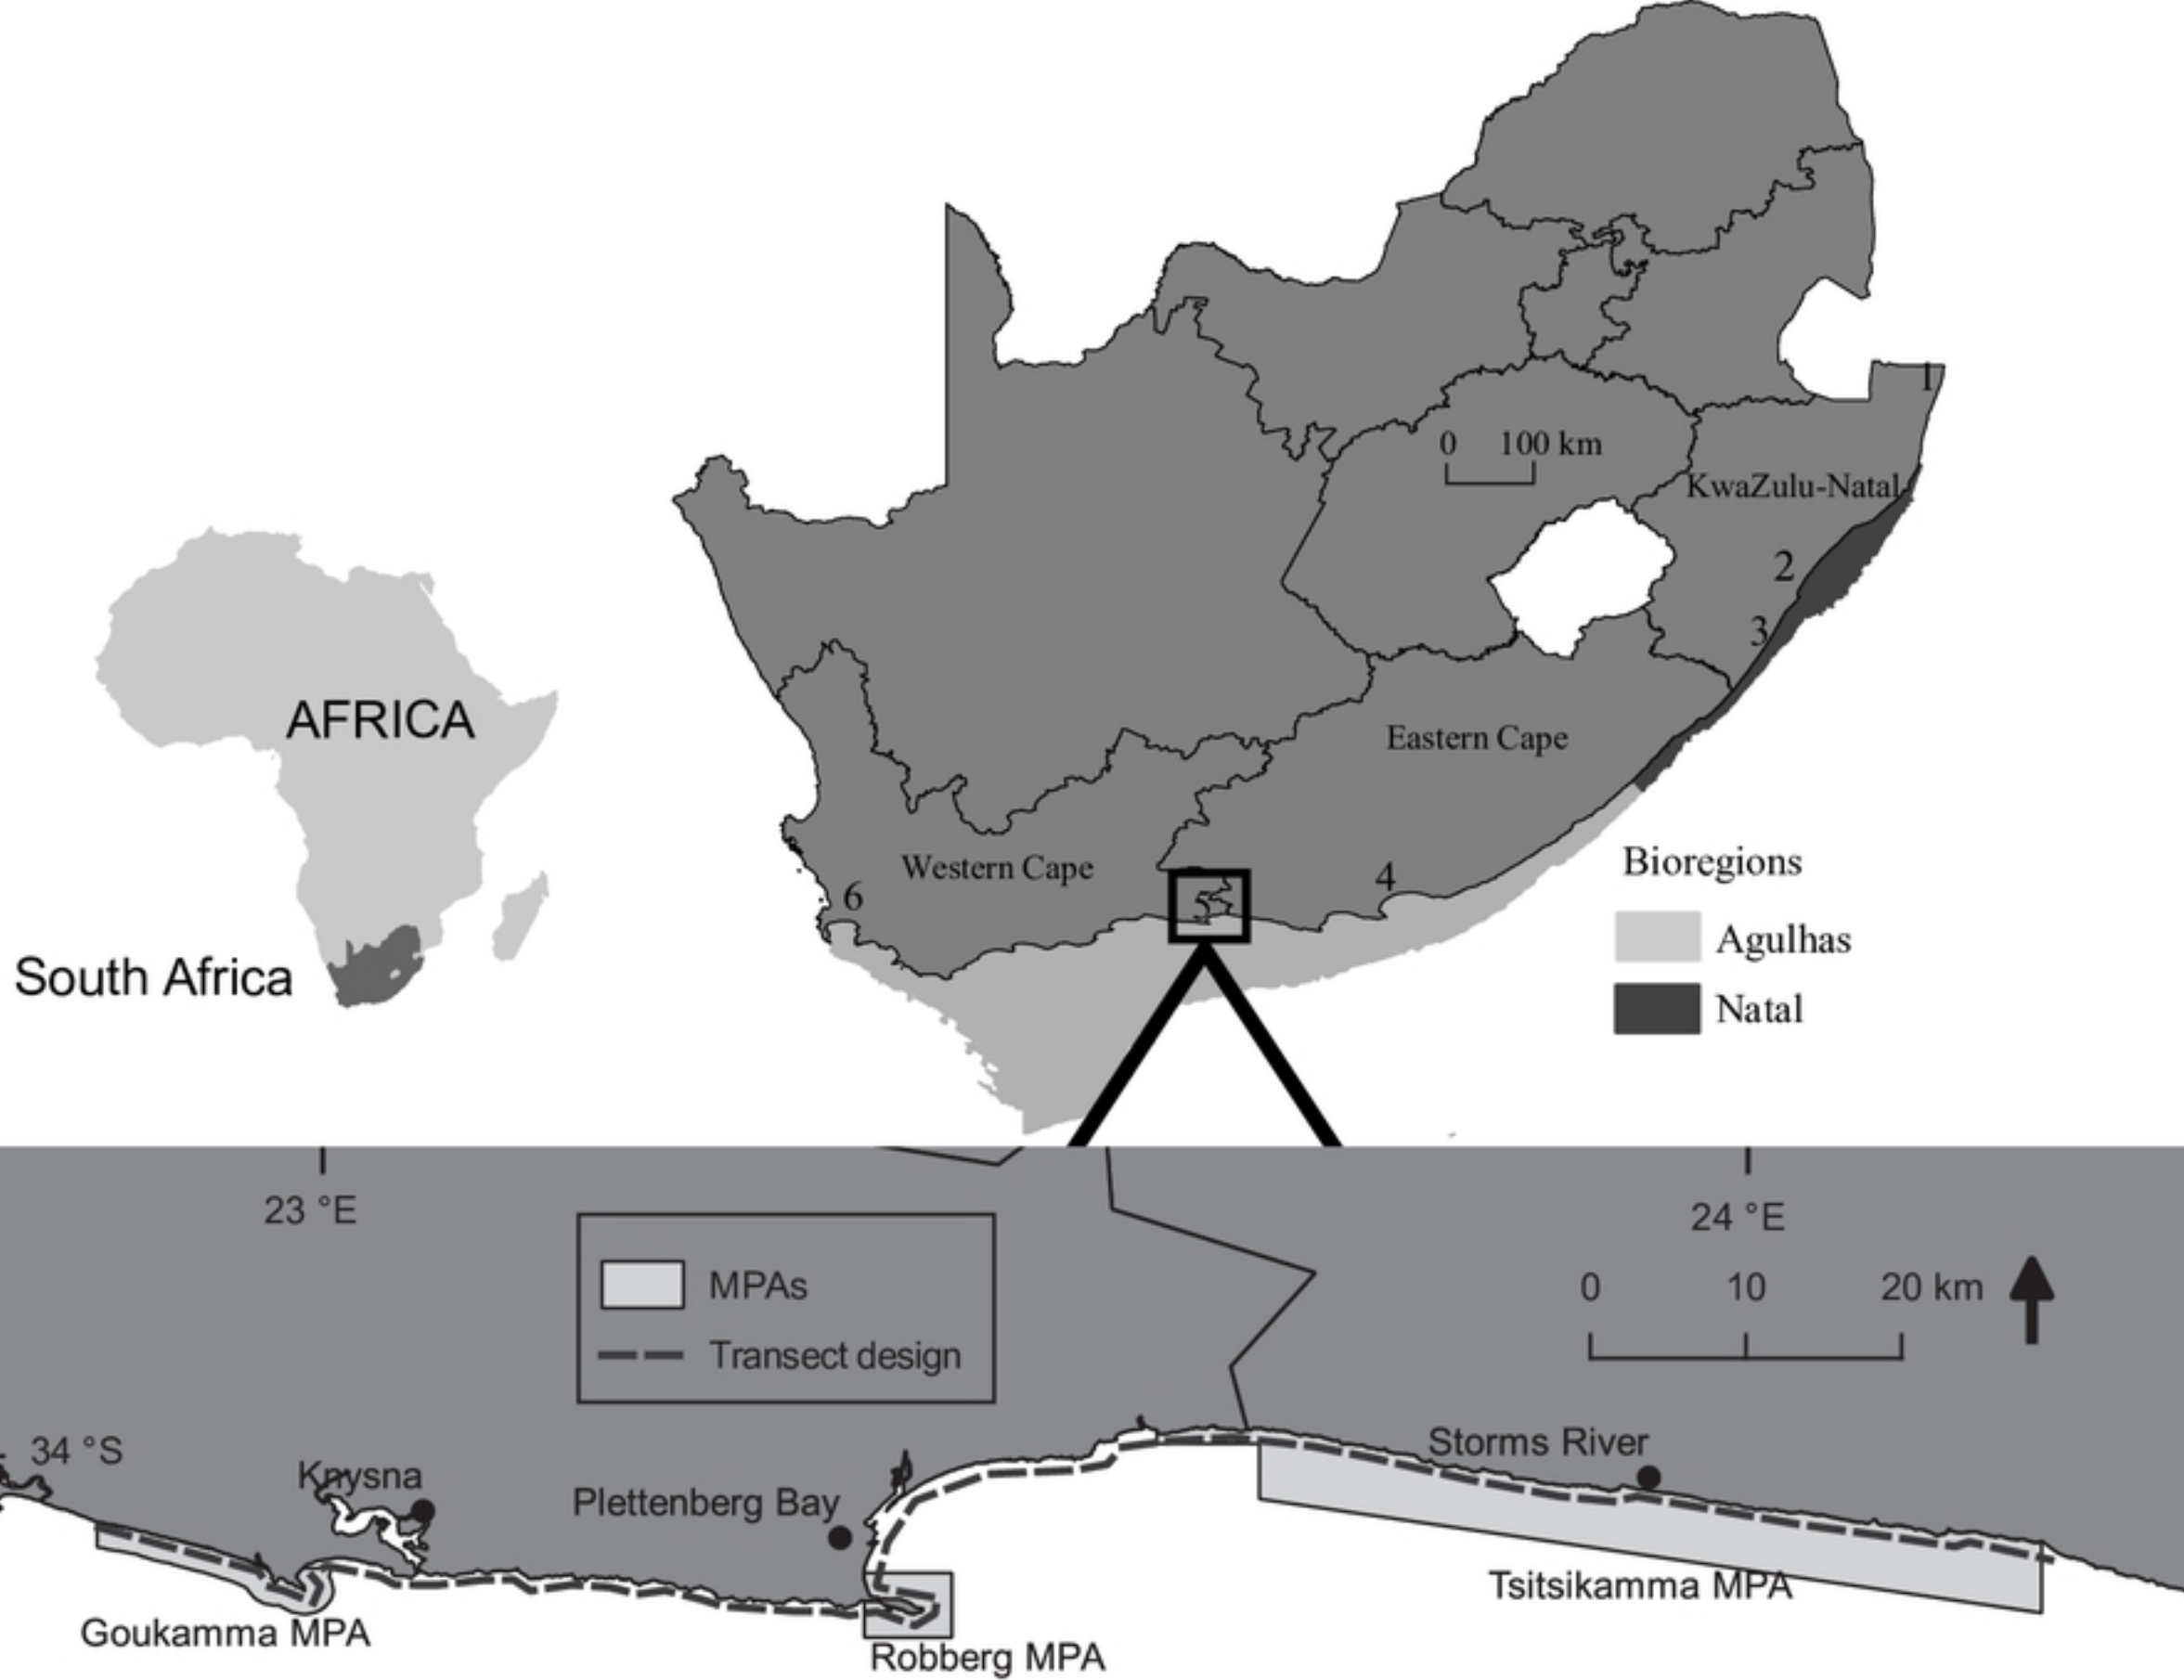

Figure 1 Map



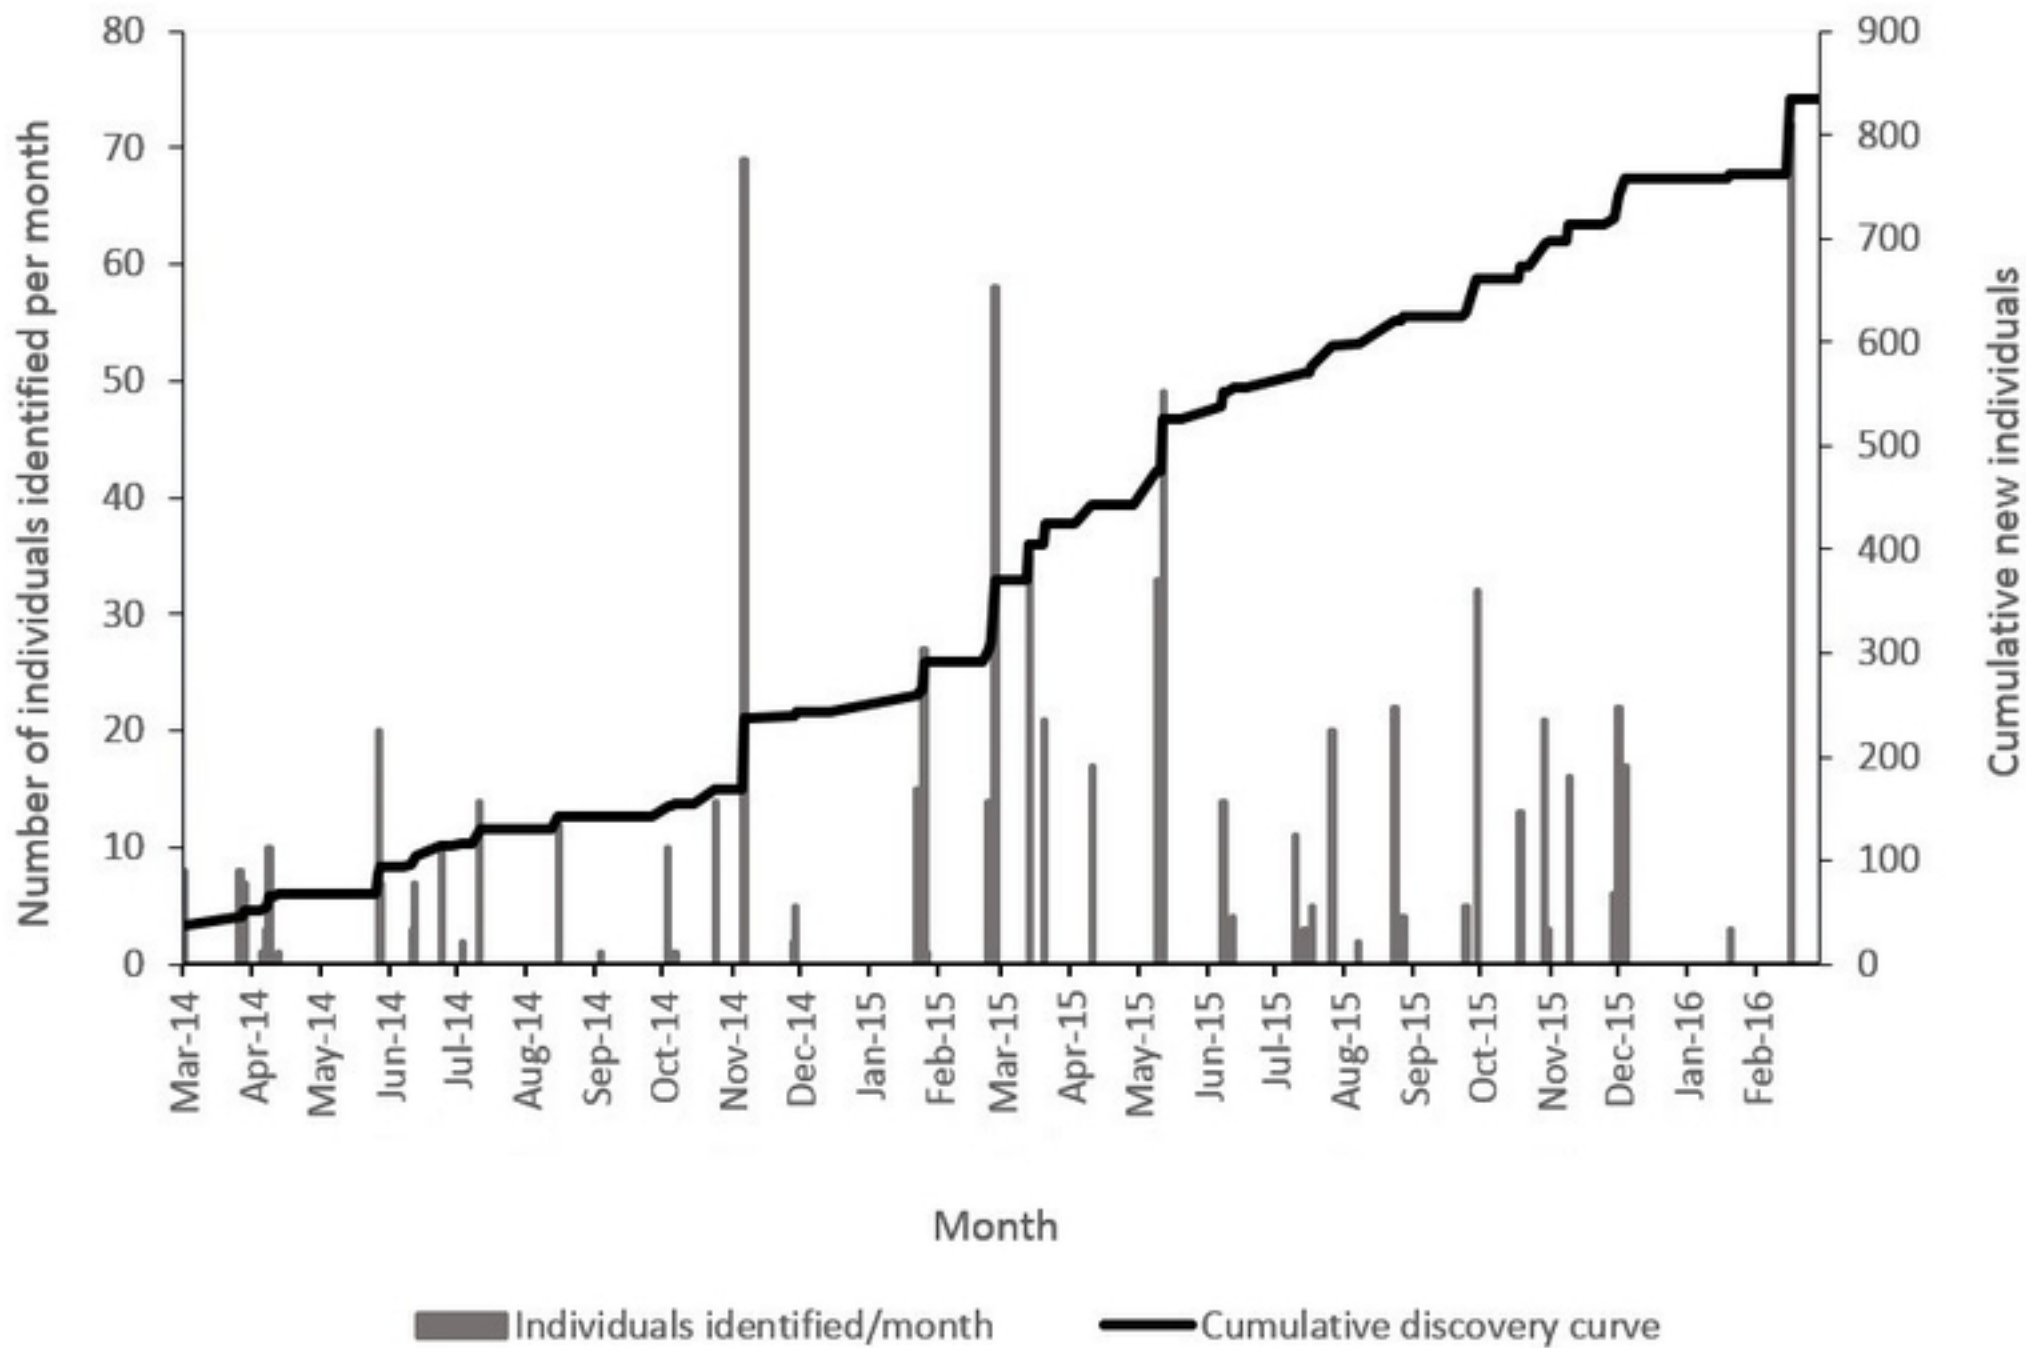

Figure 2 Curve
